# Supplementary material
Source: publisher figshare collection journal article supplement (https://acs.figshare.com/ndownloader/files/4181608)
Supplement: Supplementary file 1 [file 4181608]

## **Supporting Information Cover Sheet**

**ES&T MS:**

**Manuscript title:** An Aptamer-Based Optical Biosensor For Rapid and High-Selective Detection of 17 $\beta$ -Estradiol In Water Samples.

**Corresponding author:** Prof. April Z. Gu

**Authors:** Nimet Yildirim, Feng Long, Ce Gao, Miao He, Han-Chang Shi, April Z. Gu

**Number of Pages:** 3

**Number of Figures:** 4

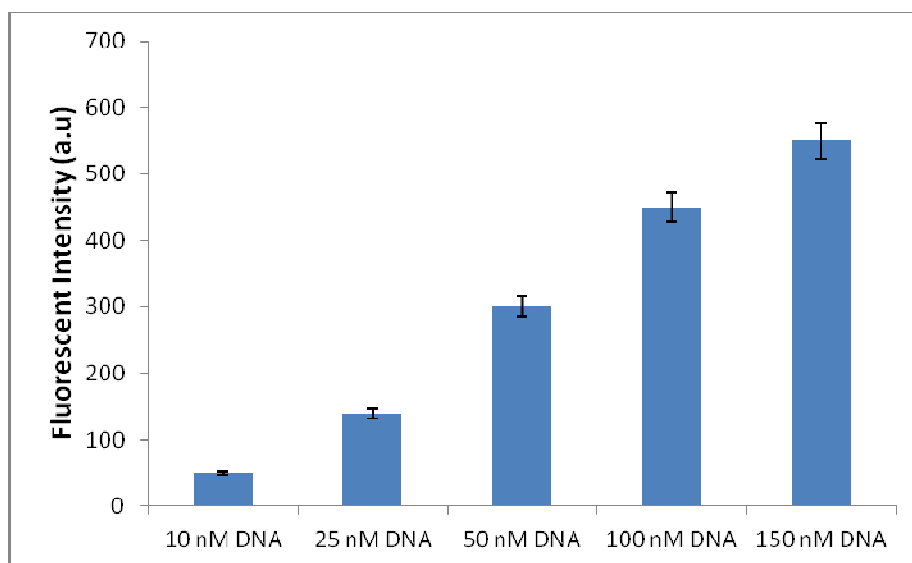

**Figure S1. Sensor signals with different concentration of fluorescent-labeled aptamer DNA applied in the mixture with 17 $\beta$ -Estradiol during the sensing procedure.**

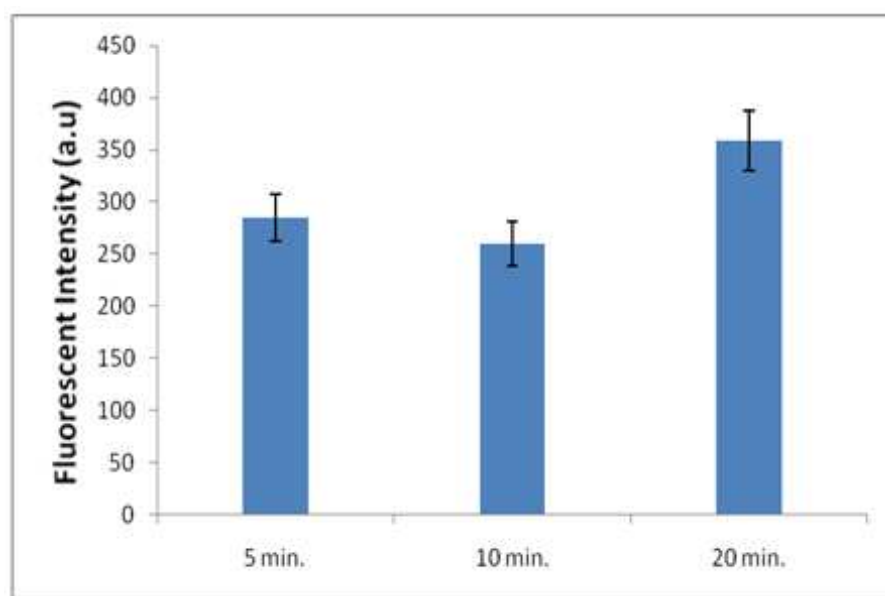

**Figure S2. Optimization of Incubation time used for binding reaction between the 17 $\beta$ -Estradiol and the Cy5.5 dye labeled 17 $\beta$ -Estradiol-aptamer.**

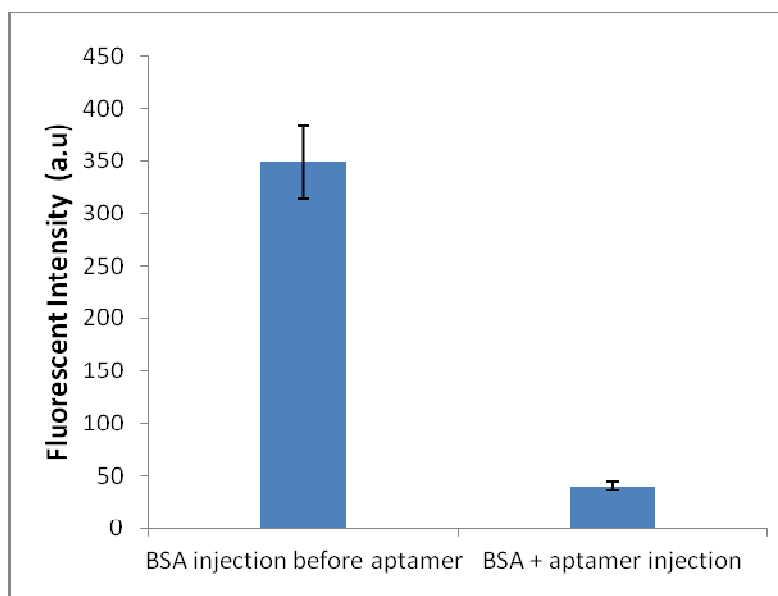

**Figure S3. Blocking the non-specific binding sites in the probe surface with BSA. Left: BSA injection before sampling; Right: simultaneous injection of BSA mixed with  $17\beta$ -Estradiol and the Cy5.5 dye labeled  $17\beta$ -Estradiol-aptamer.**

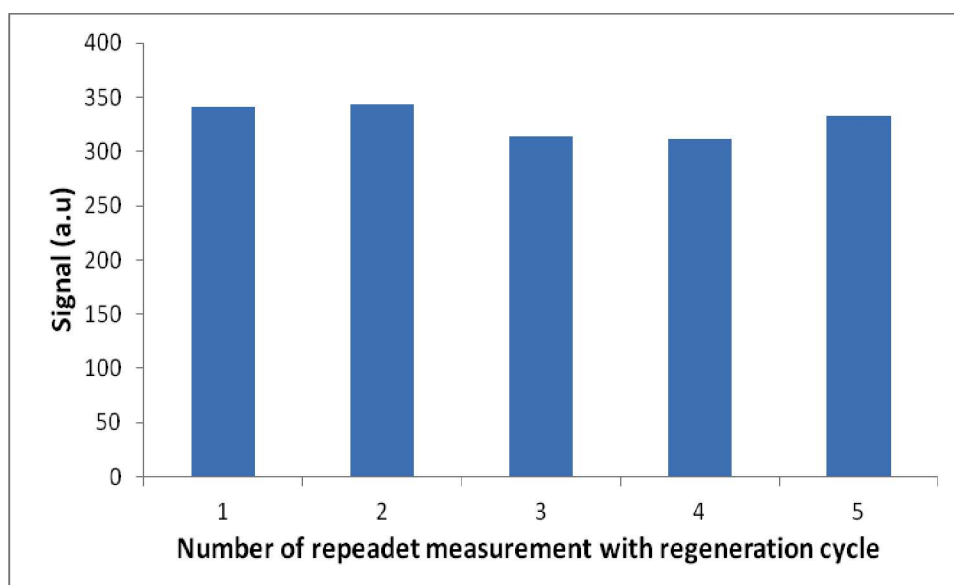

**Figure S4. Exemplary aptamer based fiber optic biosensor response curves after a number of consecutive regeneration cycles.**
